# Supplementary material
Source: Springer Nature journal article supplement (https://www.springermedizin.de/resource/supplementary/12986_2008_166_MOESM1_ESM.pdf/25655606)

Knee Extensors

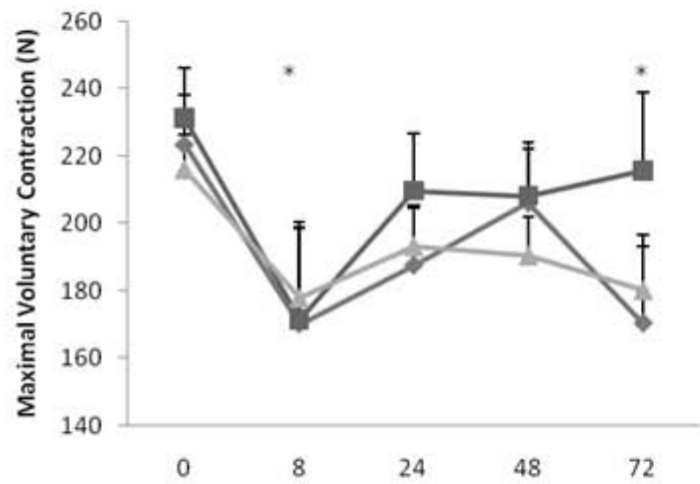

◆ HMB-Pre  
■ HMB-Post  
▲ Placebo

Time (hours)

Knee Flexors

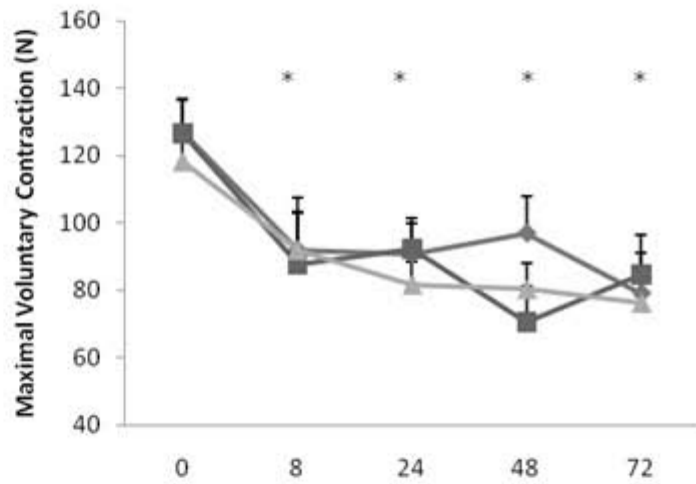

Supplement: MOESM1 [file 25655606]
